# Supplementary material for: Caesarean section rates in Mozambique
Source: Springer Nature journal article supplement (doi:10.1186/s12884-015-0686-x), 2015-10-12
Supplement: MOESM1 [file 9743472]

Appendix 1. Percentages of facility-based births <sup>(a)</sup> and the C-section rate of facility-based births (%) by area, women having given birth within three years prior to the DHS surveys in 1997, 2003 and 2011, Mozambique.

|                                |                      | 1997     |                       | 2003     |                       | 2011     |                       | <i>P value ,1<sup>st</sup> vs 2<sup>nd</sup> period</i> | <i>P value , 2<sup>nd</sup> vs 3<sup>rd</sup> period</i> |
|--------------------------------|----------------------|----------|-----------------------|----------|-----------------------|----------|-----------------------|---------------------------------------------------------|----------------------------------------------------------|
|                                |                      | (n=3244) | (n=3216) <sup>b</sup> | (n=5409) | (n=5406) <sup>b</sup> | (n=6170) | (n=6170) <sup>b</sup> |                                                         |                                                          |
|                                |                      | Births % | C-section %           | Births % | C-section %           | Births % | C-section %           |                                                         |                                                          |
| <i>Between urban and rural</i> |                      |          |                       |          |                       |          |                       |                                                         |                                                          |
| Urban                          | Public health center | 27.4     | 4.4                   | 40.5     | 0.4                   | 37.0     | 6.5                   | <0.01                                                   | <0.01                                                    |
|                                | Public hospital      | 56.5     | 8.8                   | 44.4     | 9.9                   | 47.1     | 14.7                  | 0.50                                                    | <0.01                                                    |
|                                | Other                | 0.53     | 0                     | 1.8      | 8.8                   | 3.1      | 11.7                  | 0.54                                                    | 0.67                                                     |
| <i>P value 3</i>               |                      |          | 0.11                  |          | <0.01                 |          | <0.01                 |                                                         |                                                          |
| Rural                          | Public health center | 24.4     | 1.8                   | 33.5     | 0.4                   | 38.4     | 3.3                   | <0.01                                                   | <0.01                                                    |
|                                | Public hospital      | 14.0     | 4.1                   | 4.8      | 8.9                   | 11.5     | 8.5                   | <0.05                                                   | 0.88                                                     |
|                                | Other                | 0.72     | 0                     | 2.1      | 1.3                   | 3.4      | 8.3                   | 0.62                                                    | <0.05                                                    |
| <i>P value 3</i>               |                      |          | 0.09                  |          | <0.01                 |          | <0.01                 |                                                         |                                                          |
| <i>Across regions</i>          |                      |          |                       |          |                       |          |                       |                                                         |                                                          |
| North                          | Public health center | 21.6     | 1.6                   | 28.2     | 1.0                   | 38.6     | 2.7                   | 0.52                                                    | <0.05                                                    |
|                                | Public hospital      | 11.6     | 8.1                   | 14.1     | 7.3                   | 13.3     | 7.9                   | 0.81                                                    | 0.81                                                     |
|                                | Other                | 0.23     | 0                     | 1.5      | 0                     | 2.1      | 12.1                  | --                                                      | 0.09                                                     |
| <i>P value 3</i>               |                      |          | <0.05                 |          | <0.01                 |          | <0.01                 |                                                         |                                                          |
| Central                        | Public health centre | 29.7     | 2.2                   | 38.5     | 0.2                   | 36.6     | 5.6                   | <0.01                                                   | <0.01                                                    |
|                                | Public hospital      | 16.0     | 5.0                   | 11.0     | 4.5                   | 18.2     | 8.3                   | 0.82                                                    | 0.06                                                     |

|                  |                      |      |      |      |       |      |       |       |       |
|------------------|----------------------|------|------|------|-------|------|-------|-------|-------|
|                  | Other                | 0.56 | 0    | 1.99 | 0     | 3.14 | 7.1   | --    | 0.07  |
| <i>P value 3</i> |                      |      | 0.16 |      | <0.01 |      | 0.12  |       |       |
| South            | Public health center | 22.8 | 3.6  | 39.3 | 0.3   | 39.4 | 3.8   | <0.01 | <0.01 |
|                  | Public hospital      | 43.0 | 7.0  | 32.6 | 12.9  | 37.7 | 17.0  | <0.01 | <0.05 |
|                  | Other                | 1.2  | 0    | 2.5  | 9.3   | 4.6  | 10.5  | 0.25  | 0.84  |
| <i>P value 3</i> |                      |      | 0.12 |      | <0.01 |      | <0.01 |       |       |

<sup>a</sup> Place of delivery: “public health center”: 7% of births occurred at a “public health post” in the 1997 survey, but none in the 2003 survey, and there was no “public health post” category in the 2011 survey; “other” includes private and non-specified health facilities. Information on “place of delivery” was missing for 11 women in the 1997 survey, 5 women in 2003 and 86 women in 2011.

For the proportions of home births, see Table 1.

<sup>b</sup> Information on “C-section” was missing for 39 women in the 1997 survey, 8 women in 2003 and 86 women in 2011.

Appendix 2. Percentage of facility-based births<sup>(a)</sup> and C-section rate of facility-based births (%) by household wealth quintile, women having given birth within three years prior to the DHS surveys in 2003 and 2011, Mozambique.

|                  |                      | 2003     |                       | 2011     |                       | <i>P value, 2<sup>nd</sup> vs 3<sup>rd</sup> period</i> |
|------------------|----------------------|----------|-----------------------|----------|-----------------------|---------------------------------------------------------|
|                  |                      | (n=5409) | (n=5406) <sup>b</sup> | (n=6170) | (n=6170) <sup>b</sup> |                                                         |
|                  |                      | Births % | C-section %           | Births % | C-section %           |                                                         |
| Poorest          | Public health center | 23.7     | 0.7                   | 28.2     | 3.2                   | <0.05                                                   |
|                  | Public hospital      | 4.1      | 2.0                   | 5.6      | 8.1                   | 0.16                                                    |
|                  | Other                | 2.4      | 0                     | 3.5      | 10.5                  | 0.07                                                    |
| <i>P value 3</i> |                      |          | 0.55                  |          | <0.05                 |                                                         |
| Poor             | Public health center | 32.1     | 0.3                   | 33.9     | 5.3                   | <0.01                                                   |
|                  | Public hospital      | 3.9      | 5.4                   | 9.1      | 5.5                   | 1.00                                                    |
|                  | Other                | 2.1      | 0                     | 2.0      | 0                     |                                                         |
| <i>P value 3</i> |                      |          | <0.01                 | 0.51     |                       |                                                         |
| Middle           | Public health center | 42.5     | 0.4                   | 39.5     | 3.5                   | <0.01                                                   |
|                  | Public hospital      | 7.8      | 7.1                   | 14.4     | 6.8                   | 0.84                                                    |
|                  | Other                | 1.8      | 0                     | 5.0      | 8.1                   | 0.54                                                    |
| <i>P value 3</i> |                      |          | <0.01                 |          | 0.09                  |                                                         |
| Richer           | Public health center | 47.3     | 0.4                   | 46.7     | 3.6                   | <0.01                                                   |
|                  | Public hospital      | 25.9     | 7.1                   | 29.1     | 7.5                   | 0.84                                                    |
|                  | Other                | 1.8      | 5.3                   | 3.0      | 10.0                  | 0.54                                                    |
| <i>P value 3</i> |                      |          | <0.01                 |          | <0.01                 |                                                         |
| Richest          | Public health center | 35.3     | 0.3                   | 39.8     | 5.6                   |                                                         |
|                  | Public hospital      | 54.6     | 12.5                  | 51.8     | 18.6                  | <0.01                                                   |
|                  | Other                | 2.0      | 14.3                  | 3.1      | 15.0                  | <0.01                                                   |
| <i>P value 3</i> |                      |          | <0.01                 |          | <0.01                 | 0.94                                                    |

<sup>a</sup> Place of delivery: “public health center”: 7% of births occurred at a “public health post” in the 1997 survey, but none in the 2003 survey, and there was no “public health post” category in the 2011 survey; “other” includes private and non-specified health facilities. Information on “place of delivery” was missing for 5 women in the 2003 survey and 86 women in 2011.

For the proportions of home births, see Table 1.

<sup>b</sup> Information on “C-section” was missing 8 women in the 2003 survey and 86 women in 2011.
